# Supplementary material for: Impact of persistent pain symptoms on work absence, health status and employment 18 months following disabling work-related injury or illness
Source: HighWire-hosted journal article supplement (doi:10.1136/oemed-2022-108383), 2022-07-28
Supplement: oemed-2022-108383supp001_data_supplement.pdf [file oemed-2022-108383supp001_data_supplement.pdf]

*Impact of persistent pain symptoms on work absence, health status and employment 18 months following disabling work-related injury or illness – Supplementary Material Dobson et. al (2022)*

### SUPPLEMENTARY TABLES

| <b>Supplementary Table 1: Associations between Persistent Pain Status at 18 Months and Wage Replacement Duration Group, Using the 3-12 Month Group as Reference, Overall Cohort (n=1,131)</b> |                                                                         |                                                                     |               |             |
|-----------------------------------------------------------------------------------------------------------------------------------------------------------------------------------------------|-------------------------------------------------------------------------|---------------------------------------------------------------------|---------------|-------------|
| <b>Predictor</b>                                                                                                                                                                              |                                                                         | <b>Wage Replacement Duration 12-18 Months vs. 3-12 Months (Ref)</b> |               |             |
|                                                                                                                                                                                               |                                                                         | <b>OR</b>                                                           | <b>95% CI</b> |             |
|                                                                                                                                                                                               | Model Intercept                                                         | <b>0.33</b>                                                         | <b>0.19</b>   | <b>0.58</b> |
| <b>Pain Group</b>                                                                                                                                                                             | Mild Pain, Functional Impairment Unlikely                               | <b>2.38</b>                                                         | <b>1.53</b>   | <b>3.72</b> |
| Ref: No Pain Group                                                                                                                                                                            | Severe Pain, Functional Impairment Likely                               | <b>4.58</b>                                                         | <b>2.92</b>   | <b>7.20</b> |
| <b>Claimant Age</b>                                                                                                                                                                           | < 30 years old                                                          | 1.26                                                                | 0.69          | 2.28        |
| Ref: 30-39 years old                                                                                                                                                                          | 40-49 years old                                                         | 1.19                                                                | 0.72          | 1.99        |
|                                                                                                                                                                                               | 50-59 years old                                                         | 1.10                                                                | 0.69          | 1.75        |
|                                                                                                                                                                                               | Over 60 years old                                                       | 1.53                                                                | 0.91          | 2.57        |
| <b>Sex</b>                                                                                                                                                                                    | Female                                                                  | 1.03                                                                | 0.76          | 1.40        |
| Ref: Male & Other Not Specified                                                                                                                                                               |                                                                         |                                                                     |               |             |
| <b>Nature of Injury</b>                                                                                                                                                                       | Fracture                                                                | 1.09                                                                | 0.70          | 1.69        |
| Ref: Sprain/Strain/ Dislocation                                                                                                                                                               | Superficial or Open Wound                                               | 1.44                                                                | 0.83          | 2.50        |
|                                                                                                                                                                                               | Organ/Blood Vessel/Muscle Injury, Internal Injury, Crushing, Amputation | 1.16                                                                | 0.73          | 1.84        |
|                                                                                                                                                                                               | Other                                                                   | <b>0.14</b>                                                         | <b>0.05</b>   | <b>0.42</b> |
|                                                                                                                                                                                               | Unknown                                                                 | <b>1.58</b>                                                         | <b>0.98</b>   | <b>2.55</b> |
| <b>Prior Chronic Condition</b>                                                                                                                                                                | Back Problems Prior to the Work Injury                                  | 0.76                                                                | 0.50          | 1.15        |
| Ref: No Prior Condition                                                                                                                                                                       | Arthritis Prior to the Work Injury                                      | 1.10                                                                | 0.73          | 1.66        |
|                                                                                                                                                                                               | Mood Disorder Prior to the Work Injury                                  | 0.71                                                                | 0.42          | 1.19        |

Impact of persistent pain symptoms on work absence, health status and employment 18 months following disabling work-related injury or illness – Supplementary Material  
Dobson et. al (2022)

**Supplementary Table 2: Associations between Persistent Pain Status at 18 Months and Wage Replacement Duration Group, Stratified by Sex**

|                         |                                                                                                       | Women (n=497)                                              |              |              |                                                              |              |              | Men /Other not Specified (n=634)                           |              |              |                                                             |              |              |
|-------------------------|-------------------------------------------------------------------------------------------------------|------------------------------------------------------------|--------------|--------------|--------------------------------------------------------------|--------------|--------------|------------------------------------------------------------|--------------|--------------|-------------------------------------------------------------|--------------|--------------|
|                         |                                                                                                       | Wage replacement duration 3-12 months vs. 1 day - 3 months |              |              | Wage replacement duration 12-18 months vs. 5 days - 3 months |              |              | Wage replacement duration 3-12 months vs. 1 day - 3 months |              |              | Wage replacement duration 12-18 months vs. 1 day - 3 months |              |              |
|                         |                                                                                                       | OR                                                         | Lower 95% CI | Upper 95% CI | OR                                                           | Lower 95% CI | Upper 95% CI | OR                                                         | Lower 95% CI | Upper 95% CI | OR                                                          | Lower 95% CI | Upper 95% CI |
|                         | Intercept                                                                                             | <b>0.87</b>                                                | <b>0.43</b>  | <b>1.76</b>  | <b>0.27</b>                                                  | <b>0.11</b>  | <b>0.65</b>  | <b>0.53</b>                                                | <b>0.29</b>  | <b>0.97</b>  | <b>0.17</b>                                                 | <b>0.08</b>  | <b>0.35</b>  |
| Claimant Age            | < 30 years old vs. 30-39 years old                                                                    | 0.28                                                       | 0.12         | 0.67         | <b>0.27</b>                                                  | <b>0.11</b>  | <b>0.69</b>  | 1.36                                                       | 0.64         | 2.89         | 1.96                                                        | 0.89         | 4.35         |
|                         | 40-49 years old vs. 30-39 years old                                                                   | 0.74                                                       | 0.35         | 1.58         | 0.92                                                         | 0.41         | 2.04         | 1.29                                                       | 0.65         | 2.55         | 1.49                                                        | 0.73         | 3.05         |
|                         | 50-59 years old vs. 30-39 years old                                                                   | 0.82                                                       | 0.42         | 1.63         | 0.90                                                         | 0.43         | 1.87         | 1.80                                                       | 0.96         | 3.39         | 1.97                                                        | 1.00         | 3.88         |
|                         | Over 60 years old vs. 30-39 years old                                                                 | 0.48                                                       | 0.21         | 1.08         | 0.60                                                         | 0.26         | 1.37         | <b>2.76</b>                                                | <b>1.32</b>  | <b>5.78</b>  | <b>4.68</b>                                                 | <b>2.19</b>  | <b>9.98</b>  |
| Nature of Injury        | Fracture vs. Sprain/Strain/Dislocation                                                                | 1.94                                                       | 0.90         | 4.18         | 1.77                                                         | 0.78         | 4.04         | <b>4.06</b>                                                | <b>1.88</b>  | <b>8.77</b>  | <b>5.10</b>                                                 | <b>2.32</b>  | <b>11.21</b> |
|                         | Superficial or Open Wound vs. Sprain/Strain/Dislocation                                               | 0.54                                                       | 0.24         | 1.22         | 0.65                                                         | 0.29         | 1.45         | 0.43                                                       | 0.22         | 0.84         | 0.71                                                        | 0.37         | 1.34         |
|                         | Organ/Blood Vessel/Muscle Injury, Internal Injury, Crushing, Amputation vs. Sprain/Strain/Dislocation | 2.10                                                       | 1.06         | 4.18         | <b>2.10</b>                                                  | <b>1.04</b>  | <b>4.25</b>  | 0.69                                                       | 0.33         | 1.43         | 0.98                                                        | 0.48         | 2.01         |
|                         | Other vs. Sprain/Strain/Dislocation                                                                   | 1.23                                                       | 0.40         | 3.81         | 0.44                                                         | 0.10         | 1.97         | 10.02                                                      | 2.83         | 35.50        | 0.55                                                        | 0.05         | 5.64         |
|                         | Unknown vs. Sprain/Strain/Dislocation                                                                 | 0.89                                                       | 0.37         | 2.16         | 1.27                                                         | 0.54         | 2.96         | <b>2.14</b>                                                | <b>1.03</b>  | <b>4.45</b>  | <b>3.74</b>                                                 | <b>1.82</b>  | <b>7.69</b>  |
| Prior Chronic Condition | Back Problems Prior to the Work Injury vs. No Back Problems                                           | 1.17                                                       | 0.63         | 2.15         | 0.65                                                         | 0.33         | 1.29         | 0.66                                                       | 0.37         | 1.17         | 0.63                                                        | 0.35         | 1.13         |
|                         | Arthritis Prior to the Work Injury vs. No Arthritis                                                   | 1.19                                                       | 0.61         | 2.31         | 1.45                                                         | 0.74         | 2.83         | 0.88                                                       | 0.49         | 1.61         | 0.87                                                        | 0.48         | 1.57         |
|                         | Mood Disorder Prior to the Work Injury vs. No Mood Disorder                                           | 0.51                                                       | 0.26         | 1.00         | <b>0.41</b>                                                  | <b>0.20</b>  | <b>0.82</b>  | 0.62                                                       | 0.30         | 1.28         | 0.43                                                        | 0.19         | 0.94         |
| Pain Group              | Mild Pain, Functional Impairment Unlikely vs. No Pain                                                 | 1.46                                                       | 0.83         | 2.56         | <b>4.45</b>                                                  | <b>2.11</b>  | <b>9.39</b>  | <b>1.23</b>                                                | <b>0.75</b>  | <b>2.03</b>  | <b>2.62</b>                                                 | <b>1.47</b>  | <b>4.66</b>  |
|                         | Severe Pain, Functional Impairment Likely vs. No Pain                                                 | <b>2.42</b>                                                | <b>1.28</b>  | <b>4.60</b>  | <b>13.70</b>                                                 | <b>6.26</b>  | <b>30.01</b> | <b>1.98</b>                                                | <b>1.11</b>  | <b>3.53</b>  | <b>8.30</b>                                                 | <b>4.46</b>  | <b>15.46</b> |

Bold values indicate statistically significant estimate at the  $\alpha = 0.05$  level

*Impact of persistent pain symptoms on work absence, health status and employment 18 months following disabling work-related injury or illness – Supplementary Material*  
 Dobson et. al (2022)

**Supplementary Table 3: Associations between Persistent Pain Status at 18 Months and Lost Time Disability Claim Benefit Outcomes, Stratified by Sex (Women: n=497; Men/ Not Specified = 634)**

|            |                                                       | Dependent Variable 1: Total Number of LOE Days                        |               |               |                   |              |              |
|------------|-------------------------------------------------------|-----------------------------------------------------------------------|---------------|---------------|-------------------|--------------|--------------|
|            |                                                       | Women                                                                 |               |               | Men/Not Specified |              |              |
|            |                                                       | B                                                                     | Lower 95% CI  | Upper 95% CI  | B                 | Lower 95% CI | Upper 95% CI |
| Intercept  | Intercept                                             | <b>3.072</b>                                                          | <b>2.68</b>   | <b>3.463</b>  | <b>3.077</b>      | <b>2.753</b> | <b>3.401</b> |
| Pain Group | Mild Pain, Functional Impairment Unlikely vs. No Pain | 0.138                                                                 | -0.182        | 0.457         | 0.098             | -0.164       | 0.361        |
|            | Severe Pain, Functional Impairment Likely vs. No Pain | <b>0.568</b>                                                          | <b>0.236</b>  | <b>0.899</b>  | <b>0.482</b>      | <b>0.208</b> | <b>0.755</b> |
|            |                                                       | Dependent Variable 2: Total Amount of LOE Benefits                    |               |               |                   |              |              |
|            |                                                       | B                                                                     | Lower 95% CI  | Upper 95% CI  | B                 | Lower 95% CI | Upper 95% CI |
| Intercept  | Intercept                                             | <b>7.67</b>                                                           | <b>7.263</b>  | <b>8.076</b>  | <b>7.777</b>      | <b>7.432</b> | <b>8.122</b> |
| Pain Group | Mild Pain, Functional Impairment Unlikely vs. No Pain | 0.094                                                                 | -0.238        | 0.426         | 0.162             | -0.117       | 0.441        |
|            | Severe Pain, Functional Impairment Likely vs. No Pain | <b>0.49</b>                                                           | <b>0.144</b>  | <b>0.835</b>  | <b>0.48</b>       | <b>0.189</b> | <b>0.771</b> |
|            |                                                       | Dependent Variable 3: Total Amount of Healthcare Expenditure Benefits |               |               |                   |              |              |
|            |                                                       | B                                                                     | Lower 95% CI  | Upper 95% CI  | B                 | Lower 95% CI | Upper 95% CI |
| Intercept  | Intercept                                             | <b>6.845</b>                                                          | <b>6.384</b>  | <b>7.307</b>  | <b>6.994</b>      | <b>6.57</b>  | <b>7.418</b> |
| Pain Group | Mild Pain, Functional Impairment Unlikely vs. No Pain | <b>1.406</b>                                                          | <b>1.015</b>  | <b>1.797</b>  | <b>1.187</b>      | <b>0.831</b> | <b>1.543</b> |
|            | Severe Pain, Functional Impairment Likely vs. No Pain | <b>-0.396</b>                                                         | <b>-0.784</b> | <b>-0.007</b> | -0.29             | -0.658       | 0.077        |

Bold values indicate statistically significant estimate at the  $\alpha = 0.05$  level  
 Analyses adjusted for age, sex, nature of injury and prior chronic conditions

*Impact of persistent pain symptoms on work absence, health status and employment 18 months following disabling work-related injury or illness – Supplementary Material*  
Dobson et. al (2022)

**Supplementary Table 4: Associations between Persistent Pain Status at 18 Months and Wage Replacement Duration Group, Including First Wage Replacement Claim as a Predictor, Overall Cohort (n=1,131)**

| Predictor                                                 |                                                                         | Wage replacement duration 3-12 months vs. 1 day – 3 months |              |              | Wage replacement duration 12-18 months vs. 1 day – 3 months |              |              |               |                  |
|-----------------------------------------------------------|-------------------------------------------------------------------------|------------------------------------------------------------|--------------|--------------|-------------------------------------------------------------|--------------|--------------|---------------|------------------|
|                                                           |                                                                         | OR                                                         | 95% CI       | p            | OR                                                          | 95% CI       | p            |               |                  |
|                                                           | Model Intercept                                                         | 0.597                                                      | 0.354        | 1.005        | 0.052                                                       | 0.237        | 0.130        | 0.432         | <b>&lt;0.001</b> |
| <b>Pain Group</b><br>Ref: No Pain Group                   | Mild Pain, Functional Impairment Unlikely                               | 1.391                                                      | 0.957        | 2.022        | 0.083                                                       | <b>3.040</b> | <b>1.939</b> | <b>4.766</b>  | <b>&lt;0.001</b> |
|                                                           | Severe Pain, Functional Impairment Likely                               | <b>2.097</b>                                               | <b>1.367</b> | <b>3.218</b> | <b>0.001</b>                                                | <b>9.123</b> | <b>5.659</b> | <b>14.706</b> | <b>&lt;0.001</b> |
| <b>Claimant Age</b><br>Ref: 30-39 years old               | < 30 years old                                                          | 0.574                                                      | 0.329        | 1.001        | 0.050                                                       | 0.643        | 0.351        | 1.181         | 0.154            |
|                                                           | 40-49 years old                                                         | 0.981                                                      | 0.592        | 1.627        | 0.941                                                       | 1.166        | 0.684        | 1.985         | 0.573            |
|                                                           | 50-59 years old                                                         | 1.261                                                      | 0.792        | 2.009        | 0.329                                                       | 1.348        | 0.819        | 2.218         | 0.240            |
|                                                           | Over 60 years old                                                       | 1.245                                                      | 0.721        | 2.149        | 0.432                                                       | 1.808        | 1.032        | 3.167         | 0.038            |
| <b>Sex</b><br>Ref: Male & Other Not Specified             | Female                                                                  | 0.778                                                      | 0.567        | 1.068        | 0.120                                                       | 0.844        | 0.609        | 1.168         | 0.306            |
| <b>Nature of Injury</b><br>Ref: Sprain/Strain/Dislocation | Fracture                                                                | 2.804                                                      | 1.623        | 4.847        | <b>&lt;0.001</b>                                            | 3.208        | 1.820        | 5.656         | <b>&lt;0.001</b> |
|                                                           | Superficial or Open Wound                                               | 0.471                                                      | 0.279        | 0.795        | <b>0.005</b>                                                | 0.735        | 0.449        | 1.205         | 0.223            |
|                                                           | Organ/Blood Vessel/Muscle Injury, Internal Injury, Crushing, Amputation | 1.306                                                      | 0.805        | 2.120        | 0.280                                                       | 1.539        | 0.941        | 2.517         | 0.086            |
|                                                           | Other                                                                   | 3.669                                                      | 1.708        | 7.882        | <b>0.001</b>                                                | 0.528        | 0.156        | 1.781         | 0.303            |
|                                                           | Unknown                                                                 | 1.452                                                      | 0.808        | 2.608        | 0.212                                                       | 1.990        | 1.110        | 3.568         | <b>0.021</b>     |
| <b>Prior Chronic Condition</b><br>Ref: No Prior Condition | Back Problems Prior to the Work Injury                                  | 0.918                                                      | 0.599        | 1.408        | 0.696                                                       | 0.709        | 0.454        | 1.107         | 0.131            |
|                                                           | Arthritis Prior to the Work Injury                                      | 0.971                                                      | 0.621        | 1.520        | 0.899                                                       | 1.024        | 0.657        | 1.595         | 0.918            |
|                                                           | Mood Disorder Prior to the Work Injury                                  | 0.650                                                      | 0.398        | 1.061        | 0.085                                                       | 0.452        | 0.268        | 0.764         | <b>0.003</b>     |
| <b>First WSIB Claim</b>                                   | Yes vs. No                                                              | <b>1.496</b>                                               | <b>1.073</b> | <b>2.085</b> | <b>0.018</b>                                                | 1.200        | 0.855        | 1.684         | 0.292            |

Bold values indicate statistically significant estimate at the  $\alpha = 0.05$  level

*Impact of persistent pain symptoms on work absence, health status and employment 18 months following disabling work-related injury or illness – Supplementary Material*  
 Dobson et. al (2022)

**Supplementary Table 5: Associations between Persistent Pain Status at 18 Months, Comparison of Original Model, and Model Including First Wage Replacement Claim as a Predictor, Overall Cohort (n=1,131)**

|                                                                       |                                                       | Original Model |              |              | Original Model + First WSIB Claim |              |              |
|-----------------------------------------------------------------------|-------------------------------------------------------|----------------|--------------|--------------|-----------------------------------|--------------|--------------|
| Dependent Variable 1: Total Number of LOE Days                        |                                                       |                |              |              |                                   |              |              |
|                                                                       |                                                       | B              | 95% CI       |              | B                                 | 95% CI       |              |
| <b>Intercept</b>                                                      | Intercept                                             | <b>3.191</b>   | <b>2.933</b> | <b>3.449</b> | <b>3.053</b>                      | <b>2.777</b> | <b>3.329</b> |
| <b>Pain Group</b>                                                     | Mild Pain, Functional Impairment Unlikely vs. No Pain | 0.116          | -0.087       | 0.32         | 0.095                             | -0.108       | 0.298        |
|                                                                       | Severe Pain, Functional Impairment Likely vs. No Pain | <b>0.511</b>   | <b>0.300</b> | <b>0.722</b> | <b>0.494</b>                      | <b>0.284</b> | <b>0.704</b> |
| <b>First WSIB Claim</b>                                               |                                                       |                |              |              | <b>0.170</b>                      | <b>0.005</b> | <b>0.335</b> |
| Dependent Variable 2: Total Amount of LOE Benefits                    |                                                       |                |              |              |                                   |              |              |
| <b>Intercept</b>                                                      | Intercept                                             | 7.925          | 7.654        | 8.197        | <b>7.807</b>                      | <b>7.517</b> | <b>8.098</b> |
| <b>Pain Group</b>                                                     | Mild Pain, Functional Impairment Unlikely vs. No Pain | 0.134          | -0.079       | 0.348        | 0.112                             | -0.101       | 0.326        |
|                                                                       | Severe Pain, Functional Impairment Likely vs. No Pain | <b>0.477</b>   | <b>0.254</b> | <b>0.699</b> | <b>0.446</b>                      | <b>0.225</b> | <b>0.667</b> |
| <b>First WSIB Claim</b>                                               |                                                       |                |              |              | 0.113                             | -0.060       | 0.286        |
| Dependent Variable 3: Total Amount of Healthcare Expenditure Benefits |                                                       |                |              |              |                                   |              |              |
| <b>Intercept</b>                                                      | Intercept                                             | <b>6.983</b>   | <b>6.661</b> | <b>7.304</b> | <b>6.928</b>                      | <b>6.580</b> | <b>7.277</b> |
| <b>Pain Group</b>                                                     | Mild Pain, Functional Impairment Unlikely vs. No Pain | <b>0.479</b>   | <b>0.225</b> | <b>0.732</b> | <b>0.463</b>                      | <b>0.202</b> | <b>0.725</b> |
|                                                                       | Severe Pain, Functional Impairment Likely vs. No Pain | <b>1.259</b>   | <b>0.997</b> | <b>1.522</b> | <b>1.230</b>                      | <b>0.955</b> | <b>1.505</b> |
| <b>First WSIB Claim</b>                                               |                                                       |                |              |              | -0.005                            | -0.218       | 0.207        |

Bold values indicate statistically significant estimate at the  $\alpha = 0.05$  level  
 Analyses adjusted for age, sex, nature of injury and prior chronic conditions  
 Regression coefficients interpreted as a “β% increase” in the dependent variable per each unit increase in the independent variable
